# Supplementary material
Source: PubMed Central journal article supplement (PMC7360782)
Supplement: 41386_2020_692_MOESM2_ESM.pdf [file 41386_2020_692_MOESM2_ESM.pdf]

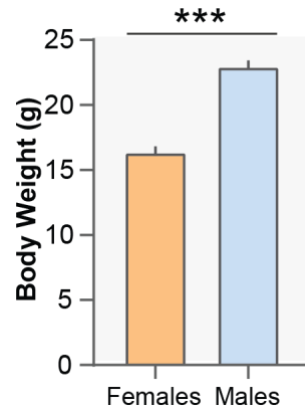

**Supplementary Figure 1.** Weights of males and females in limited discrimination group were taken at the beginning of the experiment. Males weigh more than females ( $t(41)= 9.786$ ,  $p<0.0001$ ). Data represented as mean  $\pm$  S.E.M. \*\*\*  $p<0.0001$ .

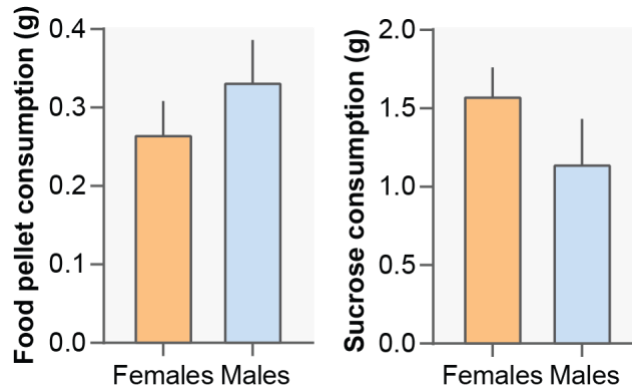

**Supplementary Figure 2.** Following a 24 hr food restriction period, mice (n=12) were given free access to regular chow (5g) then 10% sucrose (5g) in their home cages for 1 hr for each. At the end of the 1 hr period the food pellets and sucrose are weighed again to calculate total consumption. Food pellet consumption ( $t(22)= 0.9944$ ,  $p>0.05$ ) and sucrose consumption ( $t(20)= 1.343$ ,  $p>0.05$ ) was not significantly different between males and females. Data represented as mean  $\pm$  S.E.M.

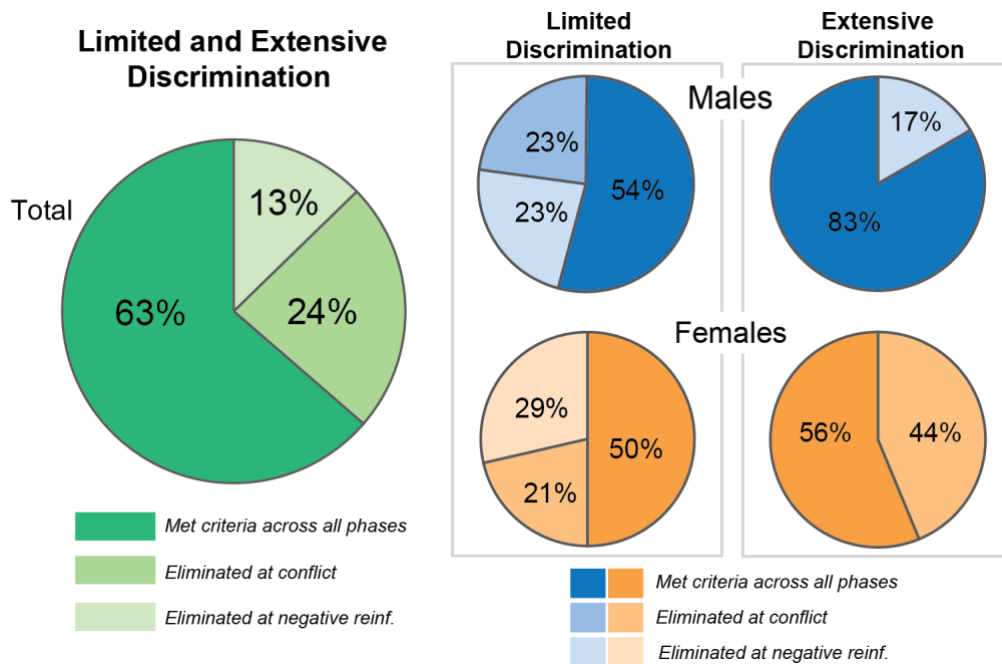

**Supplementary Figure 3.** Total mice that were eliminated from the study during negative reinforcement, during conflict, and remaining that met criteria across all phases limited and extensive discrimination combined. 54% of males and 50% females completed all phases of limited discrimination training. 100% of males completed Phase 1 and Phase 3 of extensive discrimination. 50% of the females failed to meet criterion and 50% completed both phases with extensive training.

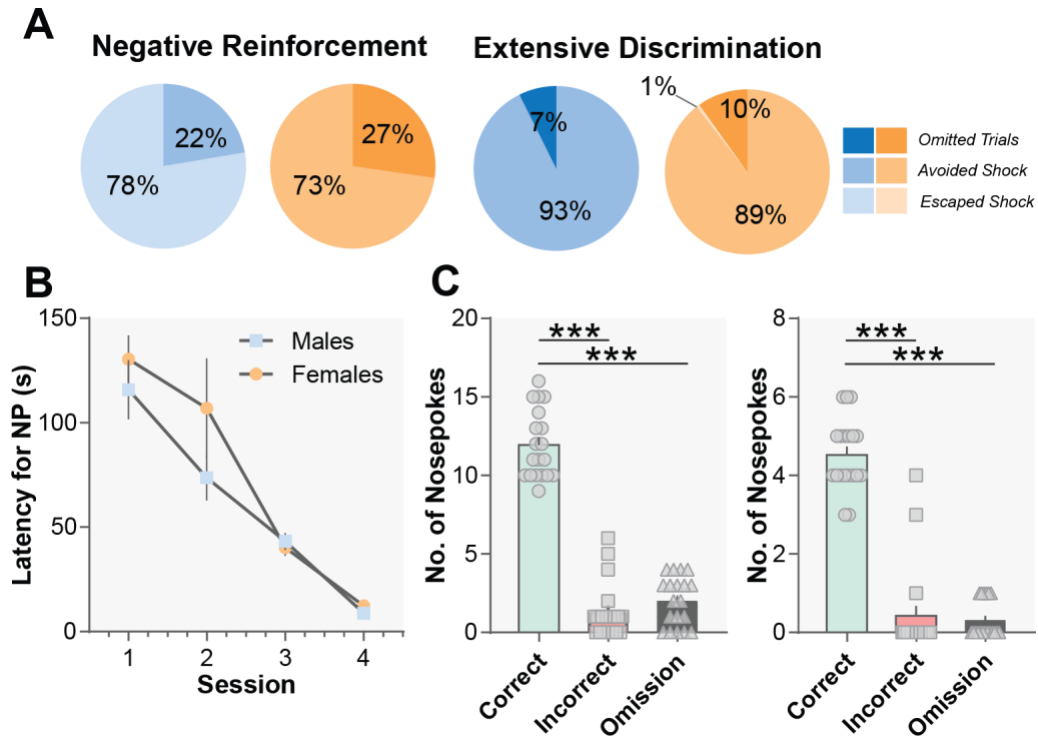

**Supplementary Figure 4. (A)** In lightest shade, the percentage of mice that escaped shocks. In medium shade, the percentage of mice that avoided shocks. In darkest shade, the percentage of mice that omitted trials. **(B)** Latency to nose-poke following cue-onset ( $S_{a2}$ ) decreases with training during negative reinforcement ( $p > 0.05$ ). **(C)** At the end of extensive discrimination, animals make a high number of responses for sucrose with comparatively few incorrect ( $p < 0.0001$ ) and omitted ( $p < 0.0001$ ) responses. Animals respond similarly at the active nose-poke to avoid/escape shocks and make comparatively few incorrect ( $p < 0.0001$ ) and omitted ( $p < 0.0001$ ) responses. Data represented as mean  $\pm$  S.E.M. \*\*\*  $p < 0.0001$ .

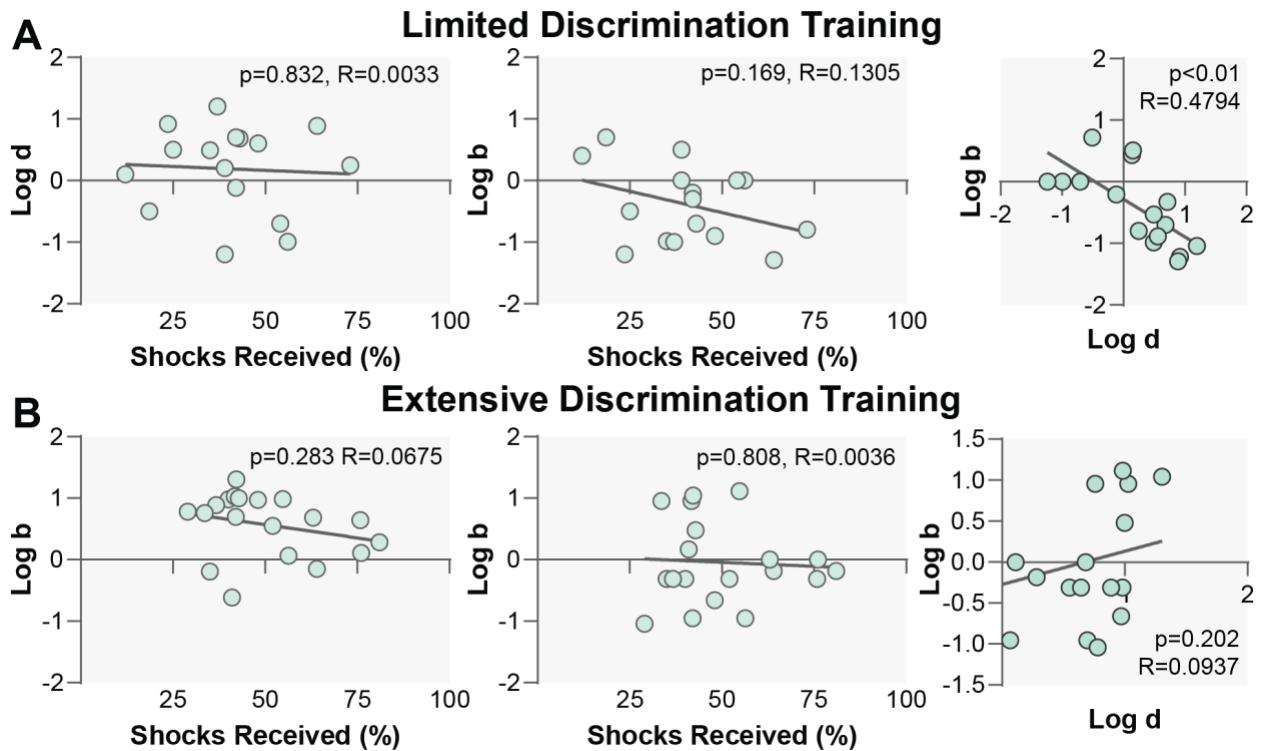

**Supplementary Figure 5. (A)** Percent of total shocks received over the course of negative reinforcement training does not correlate with  $\text{Log } d$  ( $p>0.05$ ,  $R=0.0033$ ) or  $\text{Log } b$  ( $p>0.05$ ,  $R=0.1305$ ) in limited discrimination training or in **(B)** extensive discrimination training ( $\text{Log } d$ ,  $p>0.05$ ,  $R=0.0262$ ) ( $\text{Log } b$ ,  $p>0.05$ ,  $R=0.2033$ ). **(A)** There is a significant negative correlation between  $\text{Log } b$  and  $\text{Log } d$  in limited discrimination ( $p<0.01$ ,  $R=0.4794$ ) but not in **(B)** extensive discrimination ( $p>0.05$ ,  $R=0.0753$ ).

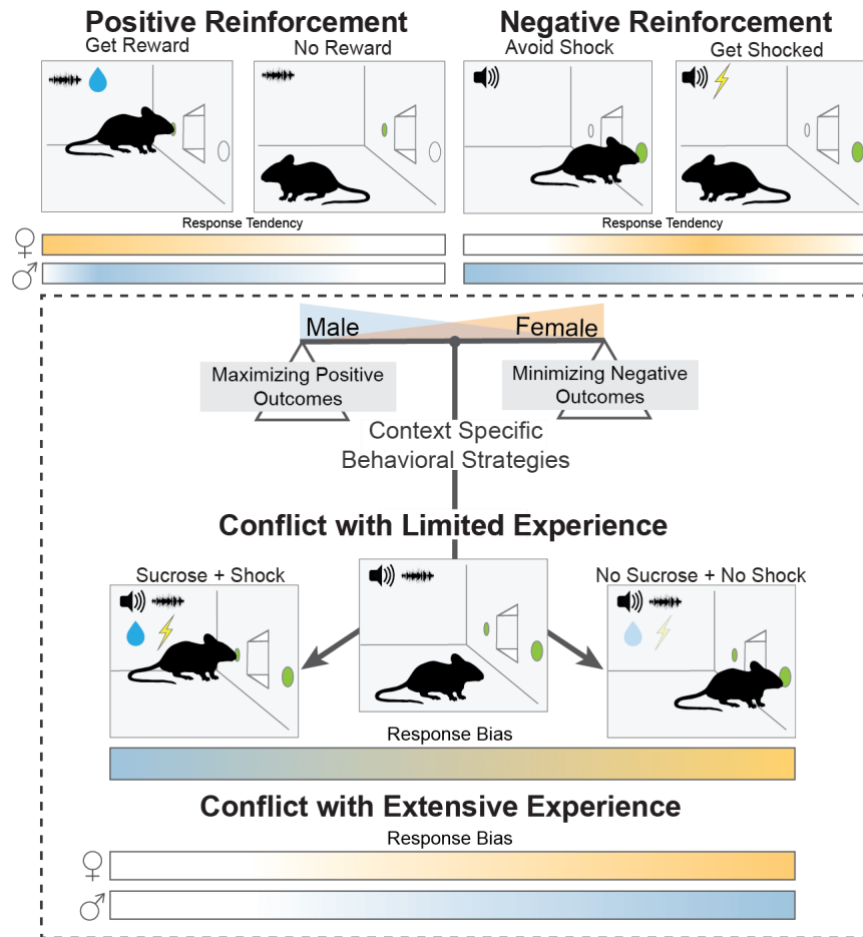

**Supplementary Figure 6. Females are biased towards avoiding aversive outcomes.** Males and females demonstrate divergent rates of learning for positive and reinforcement; however, while females learn negative reinforcement at a slower rate they are biased towards avoiding aversive outcomes when they are presented concurrently with options to obtain rewards. Further, females demonstrate a bias for punishment avoidance and males demonstrate a bias for reward-seeking in the face of an aversive stimulus.

**Supplementary Table 1. Cohen's *d* values for each experiment.**

| <u>Positive and Negative Reinforcement</u> |                            | <u>Limited Discrimination and Conflict</u> |                                                                                         | <u>Extensive Discrimination and Conflict</u> |                                                                                          | <u>Punished Responding</u> |                                    | <u>Chemogenetic Inhibition</u> |                                      |
|--------------------------------------------|----------------------------|--------------------------------------------|-----------------------------------------------------------------------------------------|----------------------------------------------|------------------------------------------------------------------------------------------|----------------------------|------------------------------------|--------------------------------|--------------------------------------|
| <b>Fig2B</b>                               | 0.28369                    | <b>Fig3B</b>                               | 0.72412 - disc - M<br>0.345946 - disc - F<br>0.185084 - conf - M<br>3.640398 - conf - F | <b>Fig4B</b>                                 | 0.56478 - M<br>0.2921 - F                                                                | <b>Fig5B</b>               | 0.17111 - vocal<br>0.45555 - motor | <b>Fig6C</b>                   | 1.9133                               |
| <b>Fig2C</b>                               | 0.98997                    | <b>Fig3C</b>                               | 1.10637 - log d<br>0.29479 - log b                                                      | <b>Fig4C</b>                                 | 0.29796                                                                                  | <b>Fig5C</b>               | 0.79299 - unpun<br>0.26472 - pun   | <b>Fig6F</b>                   | 0.56115                              |
| <b>Fig2D</b>                               | 0.59021                    |                                            |                                                                                         | <b>Fig4D</b>                                 | 1.09424 - disc - M<br>0.37737 - disc - F<br>2.40769 - conf - M<br>2.26948 - conf - F     | <b>Fig5E</b>               | 0.92196                            | <b>Fig6E</b>                   | 0.01392 - sucrose<br>0.0576 - shock  |
| <b>Fig2F</b>                               | 1.42893 - M<br>0.83181 - F |                                            |                                                                                         | <b>Fig4E</b>                                 | 2.31675 - log d - M<br>2.73934 - log d - F<br>0.20027 - log b - M<br>0.66108 - log b - F | <b>Fig5G</b>               | 1.20926                            | <b>Fig6H</b>                   | 0.36726 - sucrose<br>0.28841 - shock |
| <b>Fig2G</b>                               | 0.06178                    |                                            |                                                                                         | <b>Fig4F</b>                                 | 0.17486 - log d<br>0.2573 - log b                                                        | <b>Fig5H</b>               | 0.45748 - M<br>0.96693 - F         |                                |                                      |
|                                            |                            |                                            |                                                                                         |                                              |                                                                                          | <b>Fig5I</b>               | 0.61213                            |                                |                                      |
